# Supplementary material for: Composition of Primary and Secondary Metabolite Compounds in Seeds and Pods of Asparagus Bean (Vigna unguiculata (L.) Walp.) from China
Source: PubMed Central journal article supplement (PMC7503259; doi:10.3390/molecules25173778), 2020-08-19
Supplement: molecules-25-03778-s001.pdf [file molecules-25-03778-s001.pdf]

## Supplementary Materials for

## Composition of Primary and Secondary Metabolite Compounds in Seeds and Pods of Asparagus Bean (*Vigna unguiculata* (L.) Walp.) from China

**Table S1.** The content of primary and secondary metabolite compounds in *Vigna unguiculata* (L.) Walp. seeds (ppm (mg/kg)/ dry matter).

| Metabolite compound   | Mean  | Minimum | Maximum | Standard Error |
|-----------------------|-------|---------|---------|----------------|
| Oxalate               | 35    | 22      | 57      | 11             |
| Lactic acid           | 120   | 85      | 150     | 19             |
| Pyruvic acid          | 22    | 10      | 30      | 6              |
| Glyceric acid         | 18    | 18      | 18      | 0              |
| Succinic acid         | 13    | 6       | 20      | 4              |
| Malic acid            | 95    | 56      | 133     | 22             |
| Citric acid           | 436   | 268     | 665     | 119            |
| Nicotinic acid        | 10    | 6       | 16      | 3              |
| Azelaic acid          | 34    | 17      | 45      | 9              |
| 4-Hydroxybenzoic acid | 4     | 3       | 6       | 2              |
| Protocatechuic acid   | 31    | 21      | 46      | 8              |
| Fumaric acid          | 6     |         |         |                |
| Valine                | 9     | 5       | 15      | 3              |
| Leucine               | 6     | 4       | 7       | 1              |
| Isoleucine            | 2     |         |         |                |
| Threonine             | 18    | 5       | 43      | 12             |
| Phenylalanine         | 79    | 30      | 111     | 25             |
| Tryptophan            | 21    | 4       | 37      | 9              |
| $\alpha$ -Alanine     | 16    | 10      | 23      | 4              |
| Glycine               | 62    | 21      | 98      | 22             |
| Proline               | 10    | 5       | 15      | 5              |
| Serine                | 16    |         |         |                |
| Tyrosine              | 9     | 5       | 11      | 2              |
| Aspartic acid         | 57    | 29      | 84      | 28             |
| Asparagine            | 42    | 11      | 67      | 17             |
| Glutamic acid         | 50    | 39      | 57      | 5              |
| Oxoproline            | 62    | 30      | 95      | 19             |
| Ornithine lactam      | 12    | 6       | 15      | 3              |
| Glycerol-3-phosphate  | 12    | 11      | 13      | 1              |
| Fructose              | 15    | 9       | 24      | 5              |
| Sorbose               | 9     | 6       | 13      | 2              |
| Mannose               | 19    | 10      | 27      | 5              |
| Glucose               | 20    | 15      | 29      | 4              |
| Sucrose               | 13509 | 11807   | 15281   | 1003           |
| Raffinose             | 2013  | 862     | 2794    | 588            |
| Xylitol               | 6     |         |         |                |
| Glycerol              | 112   | 80      | 145     | 19             |
| Arabinitol            | 19    | 6       | 39      | 10             |
| Sorbitol              | 55    | 39      | 67      | 8              |
| Myo-inositol          | 216   | 73      | 448     | 117            |
| Galactinol            | 452   | 373     | 599     | 74             |
| Methyl-inositol       | 205   | 164     | 242     | 23             |

|                              |       |       |       |      |
|------------------------------|-------|-------|-------|------|
| Myo-inositol-2-phosphate     | 65    | 58    | 77    | 6    |
| 4-Hydroxybenzoic acid        | 4     | 3     | 6     | 2    |
| Protocatechuic acid          | 31    | 21    | 46    | 8    |
| Nicotinic acid               | 10    | 6     | 16    | 3    |
| Pyrogallol                   | 15    |       |       |      |
| Catechin+epi-Catechin        | 14    | 11    | 19    | 3    |
| Undecylic acid               | 26    | 21    | 32    | 3    |
| Palmitic acid                | 359   | 261   | 471   | 61   |
| Stearic acid                 | 94    | 91    | 97    | 2    |
| Arachidic acid               | 17    | 16    | 18    | 1    |
| Behenic acid                 | 45    | 26    | 75    | 15   |
| Lignoceric acid              | 20    | 15    | 27    | 4    |
| Lignoceric acid-methyl-ester | 20    | 19    | 21    | 1    |
| Oleic acid                   | 245   | 65    | 502   | 132  |
| Linoleic acid                | 469   | 322   | 701   | 117  |
| Linolenic acid               | 162   | 95    | 228   | 66   |
| Linolenic acid-methyl-ester  | 431   | 48    | 1117  | 344  |
| Acylglycerols                | 129   | 111   | 153   | 12   |
| Cholesterol                  | 23    |       |       |      |
| Isofucosterol                | 162   |       |       |      |
| Campesterol                  | 107   | 31    | 182   | 44   |
| Stigmasterol                 | 217   | 195   | 232   | 12   |
| $\beta$ -Sitosterol          | 198   | 151   | 223   | 23   |
| Cycloartenol                 | 110   | 43    | 204   | 48   |
| Adenosine                    | 27    | 6     | 50    | 13   |
| Urea                         | 289   | 271   | 319   | 15   |
| Methyl-phosphate             | 8     | 4     | 11    | 2    |
| Phosphoric acid              | 2407  | 2127  | 2885  | 240  |
| Protein*                     | 27,10 | 26,75 | 27,51 | 0,22 |

\* - content in %/ dry matter

**Table S2.** The content of primary and secondary metabolite compounds in *Vigna unguiculata* (L.) Walp. pods of old Chinese landraces and the modern cultivars 'Yunanskaya' and 'Sibirskiy razmer' (ppm (mg/kg)/ dry matter).

| Organic compound        | Mean | Minimum | Maximum | Standard Error |
|-------------------------|------|---------|---------|----------------|
| Oxalate                 | 57   | 10      | 85      | 14             |
| Lactic acid             | 294  | 134     | 808     | 130            |
| 3-Hydroxypropionic acid | 21   | 10      | 39      | 5              |
| Pyruvic acid            | 26   | 22      | 30      | 1              |
| Glyceric acid           | 53   | 20      | 75      | 10             |
| Succinic acid           | 397  | 78      | 1055    | 183            |
| Malic acid              | 472  | 272     | 9209    | 117            |
| Fumaric acid            | 7    | 4       | 10      | 1              |
| Tartaric acid           | 14   | 6       | 26      | 4              |
| Citric acid             | 257  | 101     | 367     | 52             |
| 2-Ketoglutaric acid     | 23   |         |         |                |
| Threonic acid           | 171  | 34      | 338     | 50             |
| Erythronic acid         | 55   | 15      | 110     | 17             |
| Ribonic acid            | 40   | 2,18    | 6,51    | 0,79           |
| Gluconic acid           | 350  | 206     | 501     | 55             |
| Saccharic acid          | 22   | 15      | 28      | 6              |
| Nicotinic acid          | 24   | 17      | 30      | 2              |
| Benzoic acid            | 13   |         |         |                |
| Azelaic acid            | 50   | 23      | 112     | 17             |

|                                    |       |       |       |      |
|------------------------------------|-------|-------|-------|------|
| <b>4-Hydroxybenzoic acid</b>       | 51    | 27    | 115   | 16   |
| <b>Protocatechuic acid</b>         | 7     | 4     | 9     | 3    |
| <b>4-Hydroxycinnamic acid</b>      | 104   | 59    | 162   | 24   |
| <b>Erythrono-1,4-lactone</b>       | 28    |       |       |      |
| <b>Valine</b>                      | 720   | 504   | 912   | 79   |
| <b>Leucine</b>                     | 112   | 27    | 301   | 49   |
| <b>Threonine</b>                   | 313   | 150   | 545   | 64   |
| <b>Methionine</b>                  | 58    | 9     | 96    | 14   |
| <b>Phenylalanine</b>               | 616   | 401   | 873   | 79   |
| <b>Tryptophan</b>                  | 420   | 351   | 538   | 31   |
| <b>Arginine</b>                    | 63    | 17    | 153   | 24   |
| <b><math>\alpha</math>-Alanine</b> | 951   | 783   | 1147  | 68   |
| <b>Glycine</b>                     | 3705  | 1333  | 5684  | 841  |
| <b>Proline</b>                     | 4889  | 3665  | 7372  | 672  |
| <b>Serine</b>                      | 1069  | 801   | 1349  | 97   |
| <b>Tyrosine</b>                    | 262   | 142   | 560   | 76   |
| <b>Aspartic acid</b>               | 212   | 152   | 308   | 26   |
| <b>Asparagine</b>                  | 2598  | 817   | 4892  | 712  |
| <b>Glutamic acid</b>               | 239   | 130   | 427   | 55   |
| <b>Glutamine</b>                   | 1002  | 147   | 1955  | 367  |
| <b>Ornithine</b>                   | 140   | 32    | 218   | 30   |
| <b><math>\beta</math>-Alanine</b>  | 66    | 25    | 131   | 21   |
| <b>GABA</b>                        | 1493  | 828   | 2481  | 310  |
| <b>Hydroxyproline</b>              | 234   | 197   | 272   | 37   |
| <b>Oxoproline</b>                  | 733   | 137   | 1584  | 236  |
| <b>Norleucine</b>                  | 268   | 238   | 290   | 16   |
| <b>Pipecolic acid</b>              | 19    | 14    | 26    | 2    |
| <b>Ornithine lactam</b>            | 500   | 233   | 786   | 109  |
| <b>Glycerol-3-phosphate</b>        | 249   | 51    | 404   | 104  |
| <b>Ribose</b>                      | 52    | 3     | 174   | 32   |
| <b>Fructose</b>                    | 2090  | 280   | 7451  | 1360 |
| <b>Altrose</b>                     | 23    | 11    | 47    | 6    |
| <b>Sorbose</b>                     | 490   | 128   | 1325  | 213  |
| <b>Galactose</b>                   | 53    | 10    | 199   | 37   |
| <b>Mannose</b>                     | 728   | 162   | 2207  | 374  |
| <b>Glucose</b>                     | 813   | 155   | 3051  | 561  |
| <b>Rhamnose</b>                    | 10    | 6     | 16    | 2    |
| <b>Sucrose</b>                     | 31519 | 25953 | 37615 | 1907 |
| <b>Raffinose</b>                   | 1083  | 320   | 3249  | 548  |
| <b>Methylglucoside</b>             | 24    | 17    | 37    | 4    |
| <b>Glucosamine</b>                 | 17    | 6     | 29    | 4    |
| <b>Galactose MeOX</b>              | 49    | 47    | 51    | 2    |
| <b>Glycerol</b>                    | 9848  | 499   | 1973  | 279  |
| <b>Arabinitol</b>                  | 218   | 113   | 490   | 71   |
| <b>Erythritol</b>                  | 100   | 38    | 238   | 36   |
| <b>Mannitol</b>                    | 753   | 341   | 1761  | 264  |
| <b>Dulcitol</b>                    | 1330  | 549   | 3096  | 458  |
| <b>Myo-inositol</b>                | 1338  | 358   | 3261  | 569  |
| <b>Ononitol</b>                    | 29    | 16    | 35    | 3    |
| <b>Galactinol</b>                  | 624   | 240   | 906   | 109  |
| <b>Methyl-inositol</b>             | 37    | 13    | 57    | 7    |
| <b>Desoxyglucitol</b>              | 55    | 39    | 83    | 8    |

|                                      |       |       |       |      |
|--------------------------------------|-------|-------|-------|------|
| <b>Myo-inositol-2-phosphate</b>      | 11    | 8     | 15    | 3    |
| <b>Ethanolamine</b>                  | 65    | 44    | 101   | 10   |
| <b>Phytol</b>                        | 104   | 80    | 157   | 14   |
| <b>Phytosphingosine</b>              | 37    | 10    | 51    | 8    |
| <b>Salicylic acid</b>                | 16    | 14    | 18    | 2    |
| <b>4-Hydroxybenzoic acid</b>         | 51    | 27    | 115   | 16   |
| <b>Protocatechuic acid</b>           | 7     | 4     | 9     | 3    |
| <b>4-Hydroxycinnamic acid</b>        | 104   | 59    | 162   | 24   |
| <b>Catechin+epi-Catechin</b>         | 67    | 17    | 108   | 21   |
| <b>Gallocatechin</b>                 | 21    | 13    | 29    | 8    |
| <b>Baicalein</b>                     | 17    | 5     | 24    | 6    |
| <b>Undecylic acid</b>                | 30    | 24    | 35    | 3    |
| <b>Palmitic acid</b>                 | 1009  | 609   | 1787  | 234  |
| <b>Stearic acid</b>                  | 308   | 209   | 528   | 58   |
| <b>Arachidic acid</b>                | 49    | 15    | 72    | 10   |
| <b>Behenic acid</b>                  | 36    | 25    | 48    | 4    |
| <b>Lignoceric acid</b>               | 66    | 32    | 98    | 13   |
| <b>Hydroxybehenic acid</b>           | 8     |       |       |      |
| <b>Hydroxylignoceric acid</b>        | 33    | 17    | 67    | 9    |
| <b>Oleic acid</b>                    | 147   | 85    | 226   | 25   |
| <b>Linoleic acid</b>                 | 1016  | 412   | 2194  | 319  |
| <b>Linolenic acid</b>                | 906   | 336   | 1987  | 305  |
| <b>Acylglycerols</b>                 | 196   | 55    | 439   | 69   |
| <b>Campesterol</b>                   | 336   | 219   | 444   | 37   |
| <b>Stigmasterol</b>                  | 956   | 743   | 1265  | 98   |
| <b><math>\beta</math>-Sitosterol</b> | 1681  | 980   | 2076  | 195  |
| <b><math>\alpha</math>-Amyrin</b>    | 60    | 16    | 121   | 20   |
| <b><math>\beta</math>-Amyrin</b>     | 294   | 196   | 523   | 62   |
| <b>Adenosine</b>                     | 127   | 46    | 250   | 34   |
| <b>Guanosine</b>                     | 79    | 54    | 104   | 25   |
| <b>Neophytadiene</b>                 | 94    | 73    | 115   | 21   |
| <b>Urea</b>                          | 446   | 181   | 780   | 102  |
| <b>Methyl-phosphate</b>              | 20    | 16    | 27    | 2    |
| <b>Phosphoric acid</b>               | 1667  | 1037  | 2274  | 236  |
| <b>Protein*</b>                      | 29,98 | 26,90 | 33,50 | 1,10 |

\* - content in %/ dry matter

**Table S3.** The content of primary and secondary metabolite compounds in *Vigna unguiculata* (L.) Walp. pods of old Chinese landraces (ppm (mg/kg)/ dry matter).

| <b>Organic compound</b>        | <b>Mean</b> | <b>Minimum</b> | <b>Maximum</b> | <b>Standard Error</b> |
|--------------------------------|-------------|----------------|----------------|-----------------------|
| <b>Oxalate</b>                 | 71          | 47             | 85             | 12                    |
| <b>Lactic acid</b>             | 145         | 134            | 152            | 6                     |
| <b>3-Hydroxypropionic acid</b> | 14          | 10             | 20             | 3                     |
| <b>Pyruvic acid</b>            | 24          | 22             | 25             | 1                     |
| <b>Glyceric acid</b>           | 39          | 20             | 51             | 10                    |
| <b>Succinic acid</b>           | 135         | 78             | 245            | 55                    |
| <b>Malic acid</b>              | 359         | 272            | 480            | 63                    |
| <b>Fumaric acid</b>            | 6           | 4              | 10             | 2                     |
| <b>Tartaric acid</b>           | 16          | 7              | 26             | 5                     |
| <b>Citric acid</b>             | 284         | 168            | 367            | 60                    |
| <b>Threonic acid</b>           | 102         | 34             | 137            | 34                    |

|                                            |       |       |       |      |
|--------------------------------------------|-------|-------|-------|------|
| <b>Erythronic acid</b>                     | 33    | 15    | 57    | 12   |
| <b>Ribonic acid</b>                        | 46    | 25    | 65    | 12   |
| <b>Gluconic acid</b>                       | 302   | 206   | 441   | 71   |
| <b>Saccharic acid</b>                      | 22    | 15    | 28    | 6    |
| <b>Nicotinic acid</b>                      | 23    | 17    | 30    | 4    |
| <b>Azelaic acid</b>                        | 28    | 23    | 36    | 4    |
| <b>4-Hydroxybenzoic acid</b>               | 32    | 27    | 39    | 4    |
| <b>Protocatechuic acid</b>                 | 7     | 4     | 9     | 3    |
| <b>4-Hydroxycinnamic acid</b>              | 99    | 67    | 162   | 32   |
| <b>Leucine</b>                             | 49    | 27    | 61    | 11   |
| <b>Threonine</b>                           | 383   | 301   | 545   | 81   |
| <b>Methionine</b>                          | 74    | 62    | 96    | 111  |
| <b>Phenylalanine</b>                       | 564   | 401   | 668   | 83   |
| <b>Tryptophan</b>                          | 429   | 351   | 538   | 56   |
| <b>Arginine</b>                            | 33    | 17    | 48    | 9    |
| <b><math>\alpha</math>-Alanine</b>         | 912   | 783   | 1076  | 86   |
| <b>Glycine</b>                             | 4471  | 2354  | 5684  | 1062 |
| <b>Proline</b>                             | 3977  | 3665  | 4426  | 230  |
| <b>Serine</b>                              | 1130  | 906   | 1349  | 128  |
| <b>Tyrosine</b>                            | 189   | 142   | 227   | 25   |
| <b>Aspartic acid</b>                       | 225   | 152   | 308   | 45   |
| <b>Asparagine</b>                          | 3182  | 1444  | 4892  | 996  |
| <b>Glutamic acid</b>                       | 183   | 130   | 284   | 50   |
| <b>Glutamine</b>                           | 1498  | 766   | 1955  | 370  |
| <b>Ornithine</b>                           | 149   | 137   | 161   | 7    |
| <b><math>\beta</math>-Alanine</b>          | 32    | 25    | 44    | 6    |
| <b>GABA</b>                                | 1025  | 828   | 1299  | 141  |
| <b>Hydroxyproline</b>                      | 272   |       |       |      |
| <b>Oxoproline</b>                          | 986   | 636   | 1584  | 300  |
| <b>Norleucine</b>                          | 238   |       |       |      |
| <b>Pipecolic acid</b>                      | 21    | 14    | 26    | 4    |
| <b>Ornithine-lactam</b>                    | 452   | 233   | 728   | 146  |
| <b>Glycerol-3-phosphate</b>                | 51    |       |       |      |
| <b>Ribose</b>                              | 8     | 3     | 13    | 3    |
| <b>Fructose</b>                            | 464   | 280   | 637   | 103  |
| <b>Altrose</b>                             | 15    | 10    | 18    | 2    |
| <b>Sorbose</b>                             | 243   | 128   | 311   | 58   |
| <b>Galactose</b>                           | 13    | 10    | 18    | 2    |
| <b>Mannose</b>                             | 309   | 162   | 402   | 74   |
| <b>Glucose</b>                             | 205   | 155   | 278   | 37   |
| <b>Rhamnose</b>                            | 10    | 7     | 14    | 2    |
| <b>Sucrose</b>                             | 29344 | 25953 | 32439 | 1878 |
| <b>Raffinose</b>                           | 439   | 320   | 547   | 66   |
| <b><math>\alpha</math>-Methylglucoside</b> | 28    | 19    | 37    | 5    |
| <b>Glucosamine</b>                         | 15    | 6     | 26    | 6    |
| <b>Glycerol</b>                            | 575   | 499   | 682   | 55   |
| <b>Arabinitol</b>                          | 124   | 113   | 146   | 11   |
| <b>Erythritol</b>                          | 54    | 38    | 70    | 9    |
| <b>Mannitol</b>                            | 416   | 341   | 565   | 75   |
| <b>Dulcitol</b>                            | 781   | 549   | 1085  | 159  |
| <b>Myo-inositol</b>                        | 467   | 358   | 618   | 78   |
| <b>Ononitol</b>                            | 26    | 16    | 32    | 5    |

|                                      |       |       |       |      |
|--------------------------------------|-------|-------|-------|------|
| <b>Galactinol</b>                    | 658   | 614   | 736   | 39   |
| <b>Methyl-inositol</b>               | 26    | 13    | 35    | 7    |
| <b>Desoxyglucitol</b>                | 47    | 39    | 58    | 6    |
| <b>Myo-inositol-2-phosphate</b>      | 11    | 8     | 15    | 3    |
| <b>Ethanolamine</b>                  | 59    | 44    | 70    | 8    |
| <b>Phytol</b>                        | 85    | 80    | 92    | 4    |
| <b>Phytosphingosine</b>              | 31    | 10    | 51    | 12   |
| <b>4-Hydroxybenzoic acid</b>         | 32    | 27    | 39    | 4    |
| <b>Protocatechuic acid</b>           | 7     | 4     | 9     | 3    |
| <b>4-Hydroxycinnamic acid</b>        | 99    | 67    | 162   | 32   |
| <b>Catechin+epi-Catechin</b>         | 83    | 49    | 109   | 18   |
| <b>Baicalein</b>                     | 17    | 5     | 24    | 6    |
| <b>Undecylic acid</b>                | 30    | 24    | 35    | 3    |
| <b>Palmitic acid</b>                 | 647   | 609   | 682   | 21   |
| <b>Stearic acid</b>                  | 243   | 209   | 297   | 27   |
| <b>Arachidic acid</b>                | 34    | 15    | 47    | 10   |
| <b>Behenic acid</b>                  | 39    | 31    | 48    | 5    |
| <b>Lignoceric acid</b>               | 68    | 32    | 98    | 19   |
| <b>Hydroxybehenic acid</b>           | 8     |       |       |      |
| <b>Hydroxylignoceric acid</b>        | 38    | 21    | 67    | 15   |
| <b>Oleic acid</b>                    | 157   | 116   | 226   | 35   |
| <b>Linoleic acid</b>                 | 594   | 412   | 848   | 131  |
| <b>Linolenic acid</b>                | 478   | 336   | 736   | 129  |
| <b>Acylglycerols</b>                 | 96    | 55    | 139   | 24   |
| <b>Campesterol</b>                   | 333   | 219   | 444   | 65   |
| <b>Stigmasterol</b>                  | 1026  | 755   | 1265  | 148  |
| <b><math>\beta</math>-Sitosterol</b> | 1683  | 980   | 2076  | 352  |
| <b><math>\alpha</math>-Amyrin</b>    | 85    | 43    | 121   | 23   |
| <b><math>\beta</math>-Amyrin</b>     | 352   | 203   | 523   | 93   |
| <b>Adenosine</b>                     | 87    | 46    | 115   | 21   |
| <b>Guanosine</b>                     | 54    |       |       |      |
| <b>Urea</b>                          | 563   | 354   | 780   | 123  |
| <b>Methyl-phosphate</b>              | 21    | 16    | 27    | 3    |
| <b>Phosphoric acid</b>               | 1959  | 1448  | 2274  | 258  |
| <b>Protein*</b>                      | 31,33 | 29,50 | 33,50 | 1,17 |

\* - content in %/ dry matter
